# Supplementary material for: Antioxidant and Wound Healing Bioactive Potential of Extracts Obtained from Bark and Needles of Softwood Species
Source: MDPI journal article supplement (doi:10.3390/antiox12071383), 2023-07-04
Supplement: s1 [file s1]

## SUPPLEMENTARY MATERIAL

### Wound healing bioactive potential of extracts obtained from bark and needles of softwood species

Elisabeta-Irina Geană<sup>1,\*</sup>, Corina Teodora Ciucure<sup>1</sup>, Ioana Cristina Marinas<sup>2,\*</sup>, Diana Mădălina Gaboreanu<sup>2,3</sup>, Miruna Stan<sup>2</sup>, Carmen Lidia Chitescu<sup>4</sup>

<sup>1</sup> National R&D Institute for Cryogenics and Isotopic Technologies – ICSI  
Rm. Valcea, Romania

<sup>2</sup> Research Institute of the University of Bucharest-ICUB, Bucharest,  
Romania

<sup>3</sup> National Institute of Research and Development for Biological Sciences,  
060031 Bucharest, Romania

<sup>4</sup> Faculty of Medicine and Pharmacy, “Dunarea de Jos” University of Galati,  
Galati, Romania

\* Correspondence: irina.geana@icsi.ro; radu.tamaian@icsi.ro;  
cristina.marinas@icub.unibuc.ro

#### Supplementary Tables

**Table S1.** The results of the quantitative estimation of the bioactive properties of the studied vegetal material, expressed in mg per g of dried weight vegetal material (range / mean±SD)

| µg/g DW                 | spruce needles<br>(n=13)         | spruce bark<br>(n=13)          | fir needles<br>(n=4)            | fir bark<br>(n=4)               |
|-------------------------|----------------------------------|--------------------------------|---------------------------------|---------------------------------|
| TP (mg GAE/g, dw)       | 54.31-107.06 /<br>77.03±14.29    | 22.92-141.53 /<br>105.83±31.00 | 44.50-80.37 /<br>58.00±15.52    | 21.64-40.28 /<br>30.21±9.01     |
| TF (mg Q/g, dw)         | 2.53-22.43 /<br>8.94±6.76        | 1.46-23.24/<br>9.91±7.46       | 2.76-3.67 /<br>3.17±0.38        | 1.24-2.81/<br>2.01±0.86         |
| AA (µMoli Trolox/g, dw) | 220.26- 348.76 /<br>316.12±40.96 | 84.77-348.51 /<br>318.59±70.67 | 212.99-337.19 /<br>265.91±52.31 | 103.26-170.01 /<br>135.77±33.92 |

**Table S2.** Content of total polyphenols (TP), total flavonoids (TF) and antioxidant activity (AA) in coniferous biomass (bark and needles) according to the available literature data

| Coniferous biomass | TP<br>(mg GAE/g dw)                                                          | TF<br>(mg Q/g dw)                              | AA<br>( $\mu$ M TE/g dw)                        |
|--------------------|------------------------------------------------------------------------------|------------------------------------------------|-------------------------------------------------|
| Pine bark          | 62.21 [1]<br>0.86 [2]<br>28.30 [3]<br>314.62 [4]<br>136.5 [5]                | 8.29 [2]<br>81.9 [5]                           | 200.94 [2]<br>66.96 (mg TE/g dw) [4]            |
| <b>Spruce</b> bark | 13.30 [2]<br>54.97 [6]<br>404.0 [7]<br>130.26 [8]<br>426.0 [9]<br>11.03 [10] | 3.54 [2]<br>14.44 [6]<br>53.4 [7]<br>39.91 [8] | 404.18 [2]<br>308 [9]<br>128.4(mg TEs/g dw) [6] |
| Fir bark           | 14.53 [2]                                                                    | 7.46 [2]                                       | 269.55 [2]                                      |
| Pine needles       | 14.00 [11]<br>274.38 [4]<br>7.6 [12]                                         | 7.20(mg CE/gextract) [11]<br>1.6 [12]          | 45.90(mg TE/g dw) [4]<br>305.5 [12]             |

**Table S3.** Peak numbers, target compounds, expected retention times (tR), exact mass, accurate mass, mean mass

| No                                    | Compound                            | Retention time [min] | Formula                                         | Exact mass | Experimental Accurate mass [M-H] <sup>-</sup> | Mass fragments                                   |
|---------------------------------------|-------------------------------------|----------------------|-------------------------------------------------|------------|-----------------------------------------------|--------------------------------------------------|
| <i>Phenolic acids and derivatives</i> |                                     |                      |                                                 |            |                                               |                                                  |
| 1                                     | Gallic acid                         | 2.04                 | C <sub>7</sub> H <sub>6</sub> O <sub>5</sub>    | 170.0215   | 169.0133                                      | 125.0231                                         |
| 2                                     | 3,4-Dihydroxybenzoic                | 4.22                 | C <sub>7</sub> H <sub>6</sub> O <sub>4</sub>    | 154.0266   | 153.0182                                      | 109.0281                                         |
| 3                                     | 4-Hydroxybenzoic acid               | 6.45                 | C <sub>7</sub> H <sub>6</sub> O <sub>3</sub>    | 138.0316   | 137.0231                                      | 93.0331                                          |
| 4                                     | Chlorogenic acid                    | 7.51                 | C <sub>16</sub> H <sub>18</sub> O <sub>9</sub>  | 354.0950   | 353.0879                                      | 191.0552                                         |
| 5                                     | Ferulic acid                        | 7.78                 | C <sub>10</sub> H <sub>10</sub> O <sub>4</sub>  | 194.0579   | 193.0499                                      | 178.0263, 134.0361                               |
| 6                                     | Syringic acid                       | 8.04                 | C <sub>9</sub> H <sub>10</sub> O <sub>5</sub>   | 198.0528   | 197.0448                                      | 182.0212, 153.0547, 138.0309                     |
| 7                                     | <i>p</i> -Coumaric acid             | 8.67                 | C <sub>9</sub> H <sub>8</sub> O <sub>3</sub>    | 164.0473   | 163.0390                                      | 119.0489                                         |
| 8                                     | Ellagic acid                        | 9.91                 | C <sub>14</sub> H <sub>6</sub> O <sub>8</sub>   | 302.0062   | 300.9990                                      | 300.9990                                         |
| 9                                     | Abscisic acid                       | 9.99                 | C <sub>15</sub> H <sub>20</sub> O <sub>4</sub>  | 264.1361   | 263.1289                                      | 179.9803, 191.9454                               |
| 10                                    | Cinnamic acid                       | 10.39                | C <sub>9</sub> H <sub>8</sub> O <sub>2</sub>    | 148.0524   | 147.0440                                      | 119.0487, 103.0387                               |
| 11                                    | Caffeic acid phenethyl ester (CAPE) | 13.14                | C <sub>17</sub> H <sub>16</sub> O <sub>4</sub>  | 284.1048   | 283.0975                                      |                                                  |
| <i>Flavonoids</i>                     |                                     |                      |                                                 |            |                                               |                                                  |
| 12                                    | (+)-Catechin                        | 7.57                 | C <sub>15</sub> H <sub>14</sub> O <sub>6</sub>  | 290.0790   | 289.0718                                      | 109.0278, 125.0228, 137.0232,                    |
| 13                                    | (-)-Epi-catechin                    | 8.14                 | C <sub>15</sub> H <sub>14</sub> O <sub>6</sub>  | 290.0790   | 289.0718                                      | 109.0278, 125.0228, 137.0232,                    |
| 14                                    | Myricetin                           | 8.12                 | C <sub>15</sub> H <sub>10</sub> O <sub>8</sub>  | 318.0375   | 317.0310                                      | 178.9986, 164.9263, 151.0036, 137.0244, 107.0125 |
| 15                                    | Naringin                            | 9.24                 | C <sub>27</sub> H <sub>32</sub> O <sub>14</sub> | 580.1791   | 579.1722                                      | 363.0722                                         |
| 16                                    | Rutin                               | 9.41                 | C <sub>27</sub> H <sub>30</sub> O <sub>16</sub> | 610.1533   | 609.1465                                      | 345.0616                                         |
| 17                                    | Quercetin                           | 10.71                | C <sub>15</sub> H <sub>10</sub> O <sub>7</sub>  | 302.0426   | 301.0355                                      | 151.0390, 178.9769, 121.0282                     |
| 18                                    | Kaempferol                          | 11.65                | C <sub>15</sub> H <sub>10</sub> O <sub>6</sub>  | 286.0477   | 285.0406                                      | 151.0390, 117.0180                               |
| 19                                    | Isorhamnetin                        | 11.82                | C <sub>16</sub> H <sub>12</sub> O <sub>7</sub>  | 316.0582   | 315.0512                                      | 300.0276                                         |
| 20                                    | Apigenin                            | 11.84                | C <sub>15</sub> H <sub>10</sub> O <sub>5</sub>  | 270.0528   | 269.0456                                      | 117.0180, 151.0390                               |
| 21                                    | Pinocembrin                         | 12.52                | C <sub>15</sub> H <sub>12</sub> O <sub>4</sub>  | 256.0735   | 255.0661                                      | 213.0548, 151.0026, 107.0118                     |
| 22                                    | Chrysin                             | 13.40                | C <sub>15</sub> H <sub>10</sub> O <sub>4</sub>  | 254.0579   | 253.0504                                      | 143.0491, 145.0494, 107.0118                     |
| 23                                    | Galangin                            | 13.62                | C <sub>15</sub> H <sub>10</sub> O <sub>5</sub>  | 270.0528   | 269.0454                                      | 169.0497, 143.0339                               |
| <i>Stilbens</i>                       |                                     |                      |                                                 |            |                                               |                                                  |
| 24                                    | <i>t</i> -Resveratrol               | 9.54                 | C <sub>14</sub> H <sub>12</sub> O <sub>3</sub>  | 228.0786   | 227.0710                                      | 185.0811, 143.0339                               |

accuracy (ppm) and resulted fragments (negative ionisation)

**Table S4.** Phenolic compounds content in coniferous biomass (bark and needles), according to the available literature data

| Phenolic compounds<br>(µg/g dw) | Needles            |                   |                  | Bark               |                   |                                    |
|---------------------------------|--------------------|-------------------|------------------|--------------------|-------------------|------------------------------------|
|                                 | <i>Picea abies</i> | <i>Abies alba</i> | <i>Pinus sp.</i> | <i>Picea abies</i> | <i>Abies alba</i> | <i>Pinus sp.</i><br>(mg/L extract) |
| Gallic acid                     | 695.88 [2]         | 57.04 [2]         | 208.38 [2]       | -                  | -                 | -                                  |
| 2,5-Dihydroxobenzoic Acid       | 41.3 [13]          | 5.4 [13]          | 14.1 [13]        | -                  | -                 |                                    |
| 3,4-Dihydroxobenzoic Acid       | -                  | -                 | -                |                    |                   | 29.7-64.1 [5]                      |
| 4-Hydroxybenzoic Acid           | -                  | --                | -                | -                  | -                 |                                    |
| Vanillic acid                   | 62.43 [2]          | 7.18 [2]          | 16.63 [2]        | 1.34 [14]          | -                 | 3.0-10.5 [5]                       |
| Syringic acid                   |                    |                   |                  |                    | -                 |                                    |
| <i>t</i> -Cinnamic Acid         | 4014.44 [2]        | 1148.62 [2]       | 1084.92 [2]      | 4.73 [14]          | -                 | 5.4-53.4 [5]                       |
| Caffeic acid                    | 227.0 [13]         | 38.8 [13]         | 55.8 [17]        |                    |                   | 4.2-13.8 [5]                       |
| Chlorogenic acid                | 1.56 [2]           | 0.95 [2]          | 0.46 [2]         | -                  | --                | 5.8-17.2 [5]                       |
| <i>p</i> -Coumaric acid         | 7.6 [13]           | 194.4 [13]        | 7.1 [13]         | -                  | -                 | -                                  |
| Ferullic acid                   | -                  | 113.97 [2]        | 145.44 [2]       | -                  | -                 | 9.7-24.5 [5]                       |
| Sinapinic Acid                  | 301.96 [2]         | 4.3 [13]          | 8.9 [13]         | 2.94 [14]          | -                 |                                    |
| Salicylic acid                  | 20.1 [13]          | 55.86 [2]         | 111.44 [2]       | 1.57 [15]          | -                 |                                    |
| Naringenin                      | 819.74 [2]         | 29.8 [13]         | 8.7 [13]         | -                  | -                 |                                    |
| Catechin                        | 45.1 [13]          | 1499.61 [2]       | 1502.03 [2]      | 11.17 [14]         | -                 | 105.0-135.0 [5]                    |
| Epicatechin                     | 5094.84 [2]        | 30.8 [13]         | 107.0 [13]       | 24.39 [15]         |                   | -                                  |
| Quercetin                       | 287.9 [13]         | 984.09 [2]        | 518.25 [2]       |                    |                   | 8.5-10.9 [5]                       |
| Rutin                           | 4534.29 [2]        | 10.9 [13]         | 29.1 [13]        | 0.51 [14]          | -                 | -                                  |
| Kaempferol                      | 246.2 [13]         | -                 | -                | -                  | -                 | -                                  |
| Apigenin                        | -                  | 68.75 [2]         | 387.89 [2]       |                    | -                 | 170.5 [8]                          |
| Luteolin                        | 168.58 [2]         | 15.3 [13]         | 19.9 [13]        | -                  | -                 |                                    |
| Vitexin                         | 9.0 [13]           | -                 |                  | -                  | -                 |                                    |
| Taxifolin                       | -                  | 502.20 [2]        | 2088.89 [2]      |                    | -                 | -                                  |
| Resveratrol                     | 1129.85 [2]        | 1.1 [13]          | 109.9 [13]       | -                  | -                 | 133.5 [8]                          |
| Proantocianidina B-2            | 70.2 [13]          | -                 | -                | -                  | -                 |                                    |

**Table S5.** Pharmacological activities of the bioactive compounds identified in spruce (*Picea abies* L., H. Karst.) and fir (*Abies alba* Mill.) biomass (bark and needles) by non -target HRMS analysis

| No                             | Compound                                   | PubChem CID | Pharmacological effects / Applications and medicinal activity                                                                                                                                                                                                 | Spruce<br>( <i>Picea abies</i> ) |         | Fir<br>( <i>Abies alba</i> ) |         |
|--------------------------------|--------------------------------------------|-------------|---------------------------------------------------------------------------------------------------------------------------------------------------------------------------------------------------------------------------------------------------------------|----------------------------------|---------|------------------------------|---------|
|                                |                                            |             |                                                                                                                                                                                                                                                               | Bark                             | Needles | Bark                         | Needles |
| Phenolic acids and derivatives |                                            |             |                                                                                                                                                                                                                                                               |                                  |         |                              |         |
| 1'                             | Quinic acid                                | 6508        | Antioxidant, antimicrobial, anti-inflammatory and neuroprotective [16]. A building block in the synthesis of Oseltamivir (Tamiflu), which is used to treat influenza A and B.                                                                                 | +                                | +       | +                            | +       |
| 2'                             | Shikimic acid                              | 8742        | Anti-thrombotic, anti-inflammatory and bactericidal properties [17]. Is a common precursor of aromatic compounds produced in plants and microorganisms and is known as a raw material for producing the anti-influenza drug Tamiflu.                          | +                                | +       | +                            | +       |
| 3'                             | 5-Cffeoylquinic acid (Neochlorogenic acid) | 5280633     | Antioxidant and anti-inflammatory effects [18].                                                                                                                                                                                                               | -                                | +       | +                            | +       |
| 4'                             | Salicylic acid                             | 338         | Bacteriostatic, fungicidal, and keratolytic actions.                                                                                                                                                                                                          | +                                | +       | +                            | +       |
| 5'                             | Vanillic acid                              | 8468        | It have effective sedative, antioxidant, anti-inflammatory, and neuroprotective properties [19].                                                                                                                                                              | +                                | -       | +                            | -       |
| 6'                             | Ferulic acid glucoside                     | 24992652    | It is a potential therapeutic candidate for prevention and treatment of cold stress injury and can significantly prevent cold-induced oxidative stress in liver and upregulate the protein level in brown fat tissue [20].                                    | +                                | +       | +                            | +       |
| 7'                             | 3-p-coumaroylquinic acid/ izomeri          | 9945785     | Is a primary metabolite. Is directly involved in an organism's growth, development, or reproduction ( <a href="https://Hmdb.Ca">https://Hmdb.Ca</a> ).                                                                                                        | -                                | +       | +                            | +       |
| 8'                             | 5-O-Caffeoylshikimic acid                  | 5281762     | Antioxidant, antimicrobial, anti-inflammatory, neuroprotective and antiproliferative activity against different cancer cell lines [21].                                                                                                                       | +                                | +       | +                            | +       |
| 9'                             | Caffeic acid                               | 689043      | Immunomodulatory, anti-inflammatory, antimicrobial, antioxidant and antibacterial activity in vitro, and can contribute to the prevention of atherosclerosis and other cardiovascular diseases [22].                                                          | +                                | -       | +                            | +       |
| 10'                            | Acetyl salicylic acid                      | 2244        | Non-steroidal anti-inflammatory minor analgesic, antipyretic, or anti-inflammatory. Low-dose aspirin has an antiplatelet effect and is used long-term to reduce the risk of heart attack ( <a href="https://En.Wikipedia.Org">https://En.Wikipedia.Org</a> ). | +                                | +       | +                            | +       |
| 11'                            | Vanillic acid glucoside                    | 14132336    | Antioxidant, anti-inflammatory [19].                                                                                                                                                                                                                          | +                                | +       | +                            | +       |
| 12'                            | 4-Methilbenzoic acid (toluic acid)         | 7470        | It has a role as a xenobiotic metabolite ( <a href="https://pubchem.ncbi.nlm.nih.gov/">https://pubchem.ncbi.nlm.nih.gov/</a> ).                                                                                                                               | -                                | +       | -                            | +       |
| 13'                            | Sinapic acid                               | 637775      | antioxidant, anti-cancer, anti-infammatory, cardioprotective, reno-protective, hepatoprotective, neuroprotective, anticarcinogenic, anti-diabetic and anti-bacterial properties [23].                                                                         | -                                | +       | +                            | +       |

|                                   |                                    |          |                                                                                                                                                                                                                                                                                                                                                          |   |   |   |    |
|-----------------------------------|------------------------------------|----------|----------------------------------------------------------------------------------------------------------------------------------------------------------------------------------------------------------------------------------------------------------------------------------------------------------------------------------------------------------|---|---|---|----|
| 14'                               | 4-Methoxycinnamic acid             | 699414   | Antioxidant and antilipidperoxidative effects, anti-inflammatory and anticancer properties of colon carcinogenesis [24].                                                                                                                                                                                                                                 | + | + | + | +  |
| 15'                               | Coniferyl alcohol                  | 1549095  | It is an active ingredient in the products MULTI-PHENOLIC. Is indicated for relief of sensitivities due to allergic responses. May temporarily relieve symptoms associated with sensitivities to phenolic compounds, such as rash fatigue and lack of concentration ( <a href="https://Pubchem.Ncbi.Nlm.Nih.Gov">https://Pubchem.Ncbi.Nlm.Nih.Gov</a> ). | + | + | + | +  |
| 16'                               | Homovanilic acid                   | 1738     | Is a major catecholamine metabolite. It is used as a reagent to detect oxidative enzymes and is associated with dopamine levels in the brain ( <a href="https://Hmdb.Ca">https://Hmdb.Ca</a> ).                                                                                                                                                          | + | + | + | -  |
| <b>Flavonoids and derivatives</b> |                                    |          |                                                                                                                                                                                                                                                                                                                                                          |   |   |   |    |
| 17'                               | Epigallocatechin                   | 72277    | Antioxidant, a plant metabolite and a food component ( <a href="https://Foodb.Ca/">https://Foodb.Ca/</a> ).                                                                                                                                                                                                                                              | + | + | + | +  |
| 18'                               | Procyanidin B1/B2                  | 122738   | Antioxidant, antibacterial, antineoplastic anti-obesity, anti-inflammatory and anti-allergic properties [25].                                                                                                                                                                                                                                            |   |   |   |    |
| 19'                               | Taxifolin 3-O rhamnoside (isomers) | 119258   | Analgesic and anti-edema effect ( <a href="http://www.Lifeasible.Com">Www.Lifeasible.Com</a> ).                                                                                                                                                                                                                                                          | + | + | + | +  |
| 20'                               | Phloretin                          | 4788     | Antioxidant and antidiabetic properties. It has a role as a plant metabolite and an antineoplastic agent. It can be used in facial masks, skin creams, lotions and essences ( <a href="https://En.Wikipedia.Org">https://En.Wikipedia.Org</a> ).                                                                                                         | + | + | + | +  |
| 21'                               | Dihydrokaempferol (aromodendrin)   | 662      | Anti-inflammatory, antioxidant, anti-diabetic [26].                                                                                                                                                                                                                                                                                                      | + | + | + | +  |
| 22'                               | Taxifolin glucoside                | 14187089 | Porcine pancreatic lipase inhibitory activity, antioxidant activity [27].                                                                                                                                                                                                                                                                                | + | + | + | +  |
| 23'                               | Phloretin - 2-O glucoside          | 46926173 | Estrogenic and antiestrogenic activities. It is used in the control of blood sugar levels and as a protective agent to the heart from scavenging oxygen free radicals and antioxidant injuries [28] ( <a href="https://Pubchem.Ncbi.Nlm.Nih.Gov">https://Pubchem.Ncbi.Nlm.Nih.Gov</a> ).                                                                 | + | + | + | +  |
| 24'                               | Proanthocyanidin                   | 108065   | Antioxidant, antitumor, cardioprotector, neuroprotector, antidiabetic, antimicrobial and immunostimulating properties [28].                                                                                                                                                                                                                              | + | + | + | +  |
| 25'                               | Procyanidin A2                     | 6325839  | Antioxidant, antibacterial, antineoplastic anti-obesity, anti-inflammatory and anti-allergic properties [25].                                                                                                                                                                                                                                            | + | + | + | +  |
| 26'                               | Tricin                             | 5281702  | Anti-inflammatory and is role as a chemopreventive and anticancer agent ( <a href="https://Natuprod.Bocsci.Com">https://Natuprod.Bocsci.Com</a> ).                                                                                                                                                                                                       | - | + | + | +  |
| 27'                               | Taxifolin                          | 439533   | Antioxidant, anti-inflammation, antiviral, antitumor, antibacterial, and enzyme inhibition [27].                                                                                                                                                                                                                                                         | + | + | + | +  |
| 28'                               | Vitexin-2-O-rhamnoside             | 5282151  | Supports the degradation of oxidative stress and has the potential to treat diseases of the cardiovascular system ( <a href="https://Www.Medchemexpress.Com">https://Www.Medchemexpress.Com</a> ).                                                                                                                                                       | - | + | - | ++ |
| 29'                               | Cedeodarin                         | 182026   | Anti-inflammatory, anti-bacterial, and anti-fungal properties. to inhibit the growth of various types of cancer cells ( <a href="https://Www.Benchchem.Com">https://Www.Benchchem.Com</a> ).                                                                                                                                                             | + | + | + | +  |

|                                  |                                               |           |                                                                                                                                                                                                                                  |   |   |   |     |
|----------------------------------|-----------------------------------------------|-----------|----------------------------------------------------------------------------------------------------------------------------------------------------------------------------------------------------------------------------------|---|---|---|-----|
| 30'                              | Myricetin 3 O rhamnoside                      | 5352000   | Antibacterial, anti-inflammatory, antioxidant, antitumor promoter, diuretic [29].                                                                                                                                                | + | + | + | +   |
| 31'                              | kaempferol-3- O- rutinoside                   | 122173234 | Hypoglycemic effect, biological and anti-obesity activity [30].                                                                                                                                                                  | + | + | + | +   |
| 32'                              | Kaempferol/luteolin-O-glucoside/ isomers      | 5319116   | Anti-inflammatory, antioxidant, anti-hyperuricemia and anti-gout effects [31].                                                                                                                                                   | + | + | + | +   |
| 33'                              | vitexin (apigenin 8- C- glucoside)/isovitexin | 5280441   | Anti-cancer, anti-oxidant, anti-inflammatory, anti-nociceptive, anti-AD (AD, Alzheimer's disease), anti-hypertensive, anti-spasmodic, anti-hypoxia/ischemia injury, anti-depressant-like actions and anti-viral activities [32]  | + | + | + | +++ |
| 34'                              | Pratensein/Tectprogenin                       | 5281803   | can have effects for the prevention of atherosclerosis ( <a href="https://en.wikipedia.org">https://en.wikipedia.org</a> )                                                                                                       | + | + | + | +   |
| 35'                              | Afrormosin                                    | 5281704   | anti-inflammatory, antioxidant and immunomodulatory properties [33]                                                                                                                                                              | + | + | + | +   |
| 36'                              | Liquiritigenin/liquiritigenin                 | 114829    | Antispasmodic, antiulcer, antibacterial, hepatocyte monoamine oxidase inhibitor [34].                                                                                                                                            | + | + | + | +   |
| 37'                              | Pinostrobin                                   | 4101463   | antioxidant, analgesic, anti-hemorrhagic and dermal anti-inflammatory [35]                                                                                                                                                       | + | + | + | +   |
| 38'                              | Glycitein / biochanin A                       | 5317750   | Estrogenic, antioxidant, hypocholesterolemic and cell proliferation inhibitory activities [36].                                                                                                                                  | + | + | + | +   |
| 39'                              | Daidzein                                      | 5281708   | Estrogenic, antioxidant, hypocholesterolemic and cell proliferation inhibitory activities [37]. It has a role as an antineoplastic agent, a phytoestrogen, a plant metabolite.                                                   | + | + | + | +   |
| 40'                              | 3-Methyl galangin                             | 5281946   | Antibacterial activities which also inhibits pancreatic lipase [38]                                                                                                                                                              | + | + | + | +   |
| <b>Stilbenes and derivatives</b> |                                               |           |                                                                                                                                                                                                                                  |   |   |   |     |
| 41'                              | Astringin                                     | 5281712   | Antibacterial, antifungal, antitermite, anticancer, antioxidant [39]                                                                                                                                                             | + | + | + | +   |
| 42'                              | Piceatannol glucoside                         | 11968990  | Anti-inflammatory, antioxidant, and anti-cancer activities. In addition, it has been shown to have anti-diabetic, anti-bacterial, and anti-viral activities ( <a href="https://en.wikipedia.org">https://en.wikipedia.org</a> ). | + | + | + | +   |
| 43'                              | <i>t</i> -Piceid                              | 5281718   | Antithermic [39].                                                                                                                                                                                                                | + | + | + | +   |
| 44'                              | Combretastatin A-4 (isomers)                  | 5351344   | Anticancer, antioxidant [40].                                                                                                                                                                                                    | + | + | + | +   |
| 45'                              | <i>t</i> -Isorhapontin                        | 5281716   | Antibacterial, antifungal, antithermic [39].                                                                                                                                                                                     | + | + | + | +   |
| 46'                              | <i>t</i> -Isorhapontigenin                    | 5318650   | Antibacterial, antifungal, antithermic, cardioprotection, antioxidant [39].                                                                                                                                                      | + | + | + | -   |
| 47'                              | Piceatannol                                   | 667639    | Antibacterial, cardioprotection, anticancer, antioxidant [39].                                                                                                                                                                   | + | + | + | +   |
| <b>Terpenes</b>                  |                                               |           |                                                                                                                                                                                                                                  |   |   |   |     |
| 48'                              | Toosendanin (isomers)                         | 115060    | Analgesic, insecticidal and anti-inflammatory activities [41].                                                                                                                                                                   | + | + | + | +   |
| 49'                              | Vernodalin                                    | 179375    | The active compound responsible for the anti-cancer property in human breast cancer [42].                                                                                                                                        | + | + | + | +   |
| 50'                              | Inulicin (isomers)                            | 75528891  | Inhibits angiogenesis and lung cancer cell growth [43].                                                                                                                                                                          | + | + | + | +   |
| 51'                              | Podocarpic acid                               | 93017     | Antioxidative, anti-inflammatory, anticancer [44].                                                                                                                                                                               | - | - | + | +   |
| 52'                              | Carnosol (isomers)                            | 442009    | Antioxidative, anti-inflammatory, antiproliferative [45]                                                                                                                                                                         | + | + | + | +   |

|                                         |                                        |           |                                                                                                                                                                                  |    |   |    |   |
|-----------------------------------------|----------------------------------------|-----------|----------------------------------------------------------------------------------------------------------------------------------------------------------------------------------|----|---|----|---|
| 53'                                     | Carnosic acid (isomers)                | 65126     | Antimicrobial, antioxidant and protection against carcinogens [45].                                                                                                              | +  | + | +  | + |
| 54'                                     | Rosmaridiphenol/izomer                 | 9905016   | Antioxidant, cancer preventive [46].                                                                                                                                             | +  | + | +  | + |
| 55'                                     | Rosmanol methyl ether                  | 101611746 | Anti-inflammatory, anti-angiogenic, anti-carcinogenic, neuroprotective, and anti-obesity effects ( <a href="https://www.benchmarkchem.com">https://www.benchmarkchem.com</a> ).  | ++ | - | ++ | + |
| <b>Lignans and derivatives</b>          |                                        |           |                                                                                                                                                                                  |    |   |    |   |
| 56'                                     | Hydroxymatairesinol (isomers)          | 10948757  | Anti-oxidant and it is an enterolactone precursor with anticancer activities ( <a href="https://en.wikipedia.org">https://en.wikipedia.org</a> ).                                | +  | + | +  | + |
| 57'                                     | (+)-Pinoresinol                        | 73399     | Anticancer, hypoglycemic and antifungal agent [47].                                                                                                                              | +  | + | +  | + |
| 58'                                     | Sesquipsinapol B                       | 101767126 | Antioxidant, cytotoxic [48].                                                                                                                                                     | -  | + | +  | + |
| 59'                                     | Lariciresinol / isolariciresinol       | 160521    | Antioxidant; anti-inflammatory [37].                                                                                                                                             | +  | + | +  | + |
| <b>Carboxylic acids and derivatives</b> |                                        |           |                                                                                                                                                                                  |    |   |    |   |
| 60'                                     | Citric acid                            | 311       | Anti-microbial, anti-inflammatory, anti-cancer, anti-inflammatory and anti-cancer [49].                                                                                          | +  | + | +  | + |
| 61'                                     | Suberic acid                           | 10457     | Energy storage. Is used in the preparation of reduction-sensitive micelles affecting their cellular uptake. This has potential application in delivery of anticancer drugs [50]. | +  | + | +  | + |
| 62'                                     | Azelaic acid                           | 2266      | Antibacterial, antimicrobial, anti-inflammatory, antineoplastic agent, a dermatologic drug and a plant metabolite [51].                                                          | +  | + | +  | + |
| 63'                                     | Sebacic acid                           | 5192      | Anti-HIV activity [52]                                                                                                                                                           | +  | + | +  | + |
| 64'                                     | Undecanedioic acid                     | 15816     | Nutrient with biological role is membrane stabilizer [53].                                                                                                                       | +  | + | +  | + |
| 65'                                     | Dihexyl phthalate (isomers)            | 6786      | No available study on bioactivity.                                                                                                                                               | +  | + | +  | + |
| 66'                                     | 13-keto-9Z,11E-octadecadienoic acid    | 6446027   | stimulate cell proliferation from colonic mucosa [53].                                                                                                                           | +  | + | +  | + |
| 67'                                     | 13S-hydroxy octadecadienoic acid       | 6443013   | Anticancer and biomarker from autosomal dominant polycystic kidney disease ( <a href="https://hmdb.ca">https://hmdb.ca</a> ).                                                    | +  | + | +  | + |
| 68'                                     | Retinoic acid                          | 11130378  | Is essential for development of many organs including the hindbrain, spinal cord, forelimb buds, skeleton, heart, eye, pancreas, lung and genitourinary tract [54].              | +  | + | +  | + |
| 69'                                     | Icosanedioic acid / Eicosanedioic acid | 75502     | Uses are often used in cosmetics and used as emulsifiers. Belongs to the technical field of daily chemical skin care products [55].                                              | +  | + | +  | + |
| <b>Other compounds</b>                  |                                        |           |                                                                                                                                                                                  |    |   |    |   |
| 70'                                     | Syringin                               | 5316860   | It has a role as a hepatoprotective agent, antidiabetic effects and significant anti-inflammatory activity [56].                                                                 | +  | + | +  | + |
| 71'                                     | Asystasioside A                        | 101831547 | Hypoglycemic agent with potential $\alpha$ -glucosidase inhibitory activities ( <a href="https://pubchem.ncbi.nlm.nih.gov/">https://pubchem.ncbi.nlm.nih.gov/</a> ).             | +  | + | +  | + |



|     |                                          |           |                                                                                                                                                                                                                                                                                                                 |   |   |   |      |
|-----|------------------------------------------|-----------|-----------------------------------------------------------------------------------------------------------------------------------------------------------------------------------------------------------------------------------------------------------------------------------------------------------------|---|---|---|------|
| 72' | Sacranoside A                            | 102094959 | the anti-HCV activity, drug candidate for antiviral activity against HCV ( <a href="https://pubchem.ncbi.nlm.nih.gov/">https://pubchem.ncbi.nlm.nih.gov/</a> ).                                                                                                                                                 | + | + | + | +    |
| 73' | Lucidumoside A                           | 637081    | antioxidant activity against hemolysis of red blood cells induced by free radicals.; antiviral agent [57]                                                                                                                                                                                                       | + | + | + | +    |
| 74' | Diosbulbinoside F                        | 181842    | Compound identified in the rhizome of D. bulbifera which has been used in folk and traditional Chinese medicine for the treatment of thyroid diseases and cancer [53][58]                                                                                                                                       | + | + | + | +    |
| 75' | Denipride                                | 205974    | has a positive impact on the central nervous system and has been studied for its potential use in treating neurological disorders such as Parkinson's disease ( <a href="https://pubchem.ncbi.nlm.nih.gov/">https://pubchem.ncbi.nlm.nih.gov/</a> )                                                             | + | + | + | +    |
| 76' | Propylparaben                            | 7175      | Antifungal and antimicrobial properties. is typically used in a variety of water-based cosmetics and personal-care products ( <a href="https://en.wikipedia.org/">https://en.wikipedia.org/</a> )                                                                                                               | + | + | + | +    |
| 77' | Enrasentan (isomers)                     | 178103    | It has a role as an endothelin receptor antagonist and an antihypertensive agent ( <a href="https://pubchem.ncbi.nlm.nih.gov/">https://pubchem.ncbi.nlm.nih.gov/</a> )                                                                                                                                          | + | + | + | +    |
| 78' | Embelin                                  | 3218      | It exhibits antimicrobial, antineoplastic and inhibitory activity towards hepatitis C protease. It has a role as a hepatitis C protease inhibitor, an antimicrobial agent, an antineoplastic agent and a plant metabolite ( <a href="https://pubchem.ncbi.nlm.nih.gov/">https://pubchem.ncbi.nlm.nih.gov/</a> ) | + | + | + | +    |
| 79' | Prohydrojasmon                           |           | No available study on bioactivity                                                                                                                                                                                                                                                                               |   |   |   | [54] |
| 80' | Furmecyclox                              | 43359     | Furamide fungicide ( <a href="https://pubchem.ncbi.nlm.nih.gov/">https://pubchem.ncbi.nlm.nih.gov/</a> ).                                                                                                                                                                                                       | + | + | + | +    |
| 81' | 2-Ethylhexyl salicylate                  |           | The salicylate portion of the molecule absorbs ultraviolet light to protect skin from the harmful effects of exposure to sunlight, while the ethylhexanol portion functions as an emollient ( <a href="https://pubchem.ncbi.nlm.nih.gov/">https://pubchem.ncbi.nlm.nih.gov/</a> )                               |   |   |   |      |
| 82' | Etienic acid                             | 99472     | Anticancer, anti-inflammatory, anticoagulant, antimicrobial, insecticidal/pesticidal, antioxidant and antiviral activities [59].                                                                                                                                                                                | + | + | + | +    |
| 83' | Shogaol                                  | 5281794   | 6-Shogaol exhibits a variety of biological activities including anticancer, anti-inflammation, and anti-oxidation. It has a very strong antitussive (anti-cough effect) [60].                                                                                                                                   | + | + | + | +    |
| 84' | Myristyl sulfate                         | 5248      | Sclerosing agent. It is commonly used in the treatment of small varicose veins of the legs, as well as venous and lymphatic malformations [61].                                                                                                                                                                 | + | + | + | +    |
| 85' | Abietic acid                             | 10569     | Antimicrobial, anti-inflammatory, antioxidant, and anticancer properties [62].                                                                                                                                                                                                                                  | + | + | + | +    |
| 86' | 7-deoxyloganic acid glucopyranosyl ester | 28285160* | Is a 7-deoxyloganic acid derivative (iridoid glycoside), which is a plant metabolite with anti-inflammatory effects by inhibiting the production of pro-inflammatory cytokines and antioxidant effects by scavenging free radicals and reducing oxidative stress [63].                                          |   |   | + |      |

**Table S6.** The antimicrobial and anti-biofilm activities of *P. abies* and *A. alba* alcoholic extracts vs. solvent control

|                        |                       | <i>P. aeruginosa</i><br>ATCC<br>27853 | <i>S. aureus</i><br>sc pl | <i>E. faecalis</i><br>ATCC<br>19433 | MRSA   | <i>S. marcescens</i><br>Ec5K | <i>C. albicans</i><br>ATCC 10231 |
|------------------------|-----------------------|---------------------------------------|---------------------------|-------------------------------------|--------|------------------------------|----------------------------------|
| Fir bark extract       | MIC<br>( $\mu$ L/mL)  | 31.25                                 | 250                       | 125                                 | 125    | 62.5                         | 250                              |
|                        | MBEC<br>( $\mu$ L/mL) | 31.25                                 | 125                       | 125                                 | 15.625 | 62.5                         | 15.625                           |
| Spruce needles extract | MIC<br>( $\mu$ L/mL)  | 31.25                                 | 125                       | 250                                 | 125    | 31.25                        | 62.5                             |
|                        | MBEC<br>( $\mu$ L/mL) | 31.25                                 | 31.25                     | 250                                 | 125    | 31.25                        | 31.25                            |
| Fir needles extract    | MIC<br>( $\mu$ L/mL)  | 15.625                                | 31.25                     | 125                                 | 62.5   | 62.5                         | 62.5                             |
|                        | MBEC<br>( $\mu$ L/mL) | 15.625                                | 15.625                    | 125                                 | 62.5   | 62.5                         | 31.25                            |
| Spruce bark extract    | MIC<br>( $\mu$ L/mL)  | 31.25                                 | 62.5                      | 125                                 | 62.5   | 62.5                         | 500                              |
|                        | MBEC<br>( $\mu$ L/mL) | 31.25                                 | 62.5                      | 125                                 | 62.5   | 62.5                         | 31.25                            |
| EtOH 50%               | MIC<br>( $\mu$ L/mL)  | 62.5                                  | 250                       | 125                                 | 250    | 62.5                         | 250                              |
|                        | MBEC<br>( $\mu$ L/mL) | 31.25                                 | 250                       | 62.5                                | 250    | 62.5                         | 125                              |

**Table S7.** Selectivity index values of *P. abies* bark and needles extracts and *A. abies* bark and needles extracts related to MIC and MBEC values

|                        |      | <i>P. aeruginosa</i><br>ATCC<br>27853 | Interp. | <i>S. aureus</i><br>sc pl | Interp. | <i>E. faecalis</i><br>ATCC<br>19433 | Interp. | MRSA | Interp. | <i>S. marcescens</i><br>Ec5K | Interp. | <i>C. albicans</i><br>ATCC<br>10231 | Interp. |
|------------------------|------|---------------------------------------|---------|---------------------------|---------|-------------------------------------|---------|------|---------|------------------------------|---------|-------------------------------------|---------|
| Fir bark extract       | MIC  | 1.31                                  | **B     | 0.16                      | *A      | 0.32                                | *A      | 0.33 | *A      | 0.65                         | *A      | 0.16                                | *A      |
|                        | MBEC | 1.31                                  | **B     | 0.16                      | *A      | 0.32                                | *A      | 2.62 | **B     | 0.65                         | *A      | 2.62                                | **B     |
| Spruce needles extract | MIC  | 1.15                                  | **B     | 0.14                      | *A      | 0.14                                | *A      | 0.29 | *A      | 0.58                         | *A      | 0.58                                | *A      |
|                        | MBEC | 1.15                                  | **B     | 1.14                      | **B     | 0.14                                | *A      | 0.29 | *A      | 1.15                         | **B     | 1.15                                | **B     |
| Fir needles extract    | MIC  | 1.17                                  | **B     | 0.58                      | *A      | 0.14                                | *A      | 0.29 | *A      | 0.29                         | *A      | 0.59                                | *A      |
|                        | MBEC | 1.17                                  | **B     | 1.17                      | **B     | 0.14                                | *A      | 0.29 | *A      | 0.29                         | *A      | 0.59                                | *A      |
| Spruce bark extract    | MIC  | 0.76                                  | *A      | 0.38                      | *A      | 0.19                                | *A      | 0.38 | *A      | 0.38                         | *A      | 0.05                                | *A      |
|                        | MBEC | 0.76                                  | *A      | 0.38                      | *A      | 0.19                                | *A      | 0.38 | *A      | 0.38                         | *A      | 0.76                                | *A      |

\*A - more toxic to eukaryotic cell; \*\*B—more toxic to microbial cell

**Table S8.** Docking data for the best ranked poses of the ligands in the two P-LD runs against PI3K $\gamma$  [1E8W entry]

| Target – Ligand complex                    | PyRx w/<br>Autodock Vina | SwissDock w/<br>EADock DSS |                          | Notes                |
|--------------------------------------------|--------------------------|----------------------------|--------------------------|----------------------|
|                                            | BA<br>(kcal/mol)         | FullFitness<br>(kcal/mol)  | $\Delta G$<br>(kcal/mol) |                      |
| 1E8W – 13-Keto-9Z,11E-octadecadienoic acid | -6.7                     | -4612.05                   | -8.61                    | Qualitative analysis |
| 1E8W – 13S-Hydroxyoctadecadienoic acid     | -6.9                     | -4622.29                   | -7.52                    | Qualitative analysis |
| 1E8W – 3,4-Dihydroxybenzoic acid           | -6.5                     | -4572.04                   | -6.53                    | Quantitative data    |
| 1E8W – 4-Hydroxybenzoic acid               | -6.1                     | -4574.26                   | -6.39                    | Quantitative data    |
| 1E8W – 4-Methoxycinnamic acid              | -7.2                     | -4581.41                   | -6.91                    | Qualitative analysis |
| 1E8W – Absciscic acid                      | -7.0                     | -4584.30                   | -7.21                    | Quantitative data    |
| 1E8W – Apigenin                            | -8.7                     | -4574.08                   | -7.22                    | Quantitative data    |
| 1E8W – Astringin                           | -8.9                     | -4505.15                   | -8.36                    | Qualitative analysis |
| 1E8W – Azelaic acid                        | -6.4                     | -4625.59                   | -7.30                    | Qualitative analysis |
| 1E8W – Caffeic acid phenethyl ester (CAPE) | -8.0                     | 4564.93                    | -8.03                    | Quantitative data    |
| 1E8W – Chlorogenic acid                    | -8.3                     | 4537.02                    | -8.71                    | Quantitative data    |
| 1E8W – Chrysin                             | -8.8                     | -4564.64                   | -7.10                    | Quantitative data    |
| 1E8W – Cinnamic acid                       | -7.0                     | -4582.21                   | -6.49                    | Quantitative data    |
| 1E8W – Citric acid                         | -5.6                     | -4619.89                   | -6.35                    | Qualitative analysis |
| 1E8W – Combretastatin A-4                  | -7.1                     | -4520.50                   | -7.83                    | Qualitative analysis |
| 1E8W – Ellagic acid                        | -9.4                     | -4521.51                   | -7.96                    | Quantitative data    |
| 1E8W – Embelin                             | -6.9                     | -4565.69                   | -7.56                    | Qualitative analysis |
| 1E8W – Enrasentan                          | -9.1                     | -4560.13                   | -8.34                    | Qualitative analysis |
| 1E8W – Epigallocatechin                    | -8.3                     | -4559.63                   | -8.09                    | Qualitative analysis |
| 1E8W – Ferulic acid                        | -7.2                     | -4582.86                   | -7.08                    | Quantitative data    |
| 1E8W – Fumecyclohex                        | -6.8                     | -4563.49                   | -7.27                    | Qualitative analysis |
| 1E8W – Galangin                            | -8.8                     | -4545.43                   | -7.30                    | Quantitative data    |
| 1E8W – Gallic acid                         | -6.6                     | -4571.72                   | -6.55                    | Quantitative data    |
| 1E8W – Icosanedioic acid                   | -6.8                     | -4646.61                   | -8.37                    | Qualitative analysis |
| 1E8W – Isorhamnetin                        | -9.0                     | -4541.74                   | -7.98                    | Quantitative data    |
| 1E8W – Isorhapontigenin                    | -7.9                     | -4575.25                   | -7.60                    | Qualitative analysis |
| 1E8W – Isorhapontin                        | -8.8                     | -4490.86                   | -8.24                    | Qualitative analysis |
| 1E8W – Kaempferol                          | -8.7                     | -4560.14                   | -8.05                    | Quantitative data    |
| 1E8W – Lucidumoside A                      | -8.9                     | -4530.20                   | -8.98                    | Qualitative analysis |
| 1E8W – Methylbenzoic acid                  | -6.2                     | -4561.45                   | -6.40                    | Qualitative analysis |
| 1E8W – Myricetin                           | -9.0                     | -4551.94                   | -8.40                    | Quantitative data    |
| 1E8W – Myristyl sulfate                    | -6.2                     | -4673.09                   | -8.54                    | Qualitative analysis |
| 1E8W – Naringin                            | -9.5                     | -4444.41                   | -9.92                    | Quantitative data    |
| 1E8W – Oxododecanedioic acid               | -7.2                     | -4637.53                   | -7.99                    | Qualitative analysis |
| 1E8W – p-Coumaric acid                     | -7.0                     | -4593.66                   | -6.78                    | Quantitative data    |
| 1E8W – Pinocembrin                         | -8.8                     | -4577.38                   | -7.03                    | Quantitative data    |
| 1E8W – Prohydrojasmon                      | -6.6                     | 4594.38                    | -7.52                    | Qualitative analysis |
| 1E8W – Propylparaben                       | -6.7                     | -4569.85                   | -6.78                    | Qualitative analysis |

|                                      |             |                 |              |                      |
|--------------------------------------|-------------|-----------------|--------------|----------------------|
| <b>1E8W – Quercetin [RE-DOCKING]</b> | <b>-9.1</b> | <b>-4552.31</b> | <b>-7.68</b> | Quantitative data    |
| 1E8W – Quinic acid                   | -5.9        | -4534.49        | -6.60        | Qualitative analysis |
| 1E8W – Resveratrol                   | -7.9        | -4587.38        | -7.09        | Quantitative data    |
| 1E8W – Rutin                         | -9.5        | -4418.05        | -10.16       | Quantitative data    |
| 1E8W – Sebacic acid                  | -6.5        | -4629.80        | -7.38        | Qualitative analysis |
| 1E8W – Shikimic acid                 | -5.9        | -4558.70        | -6.21        | Qualitative analysis |
| 1E8W – Shogaol                       | -7.5        | -4570.36        | -7.91        | Qualitative analysis |
| 1E8W – Suberic acid                  | -6.3        | -4628.21        | -7.46        | Qualitative analysis |
| 1E8W – Syringic acid                 | -6.6        | -4552.23        | -7.04        | Quantitative data    |
| 1E8W – Taxifolin                     | -9.2        | -4552.84        | -7.58        | Qualitative analysis |
| 1E8W – Toosendanin                   | -8.3        | -4293.84        | -8.15        | Qualitative analysis |
| 1E8W – Undecanedioic acid            | -6.7        | -4629.87        | -8.10        | Qualitative analysis |
| 1E8W – (+)-Catechin                  | -8.8        | -4564.29        | -7.92        | Quantitative data    |
| 1E8W – (-)-Epicatechin               | -8.4        | -4558.15        | -6.93        | Quantitative data    |
| 1E8W – (+)-Pinoresinol               | -7.8        | -4523.94        | -7.86        | Qualitative analysis |

## Supplementary Figures

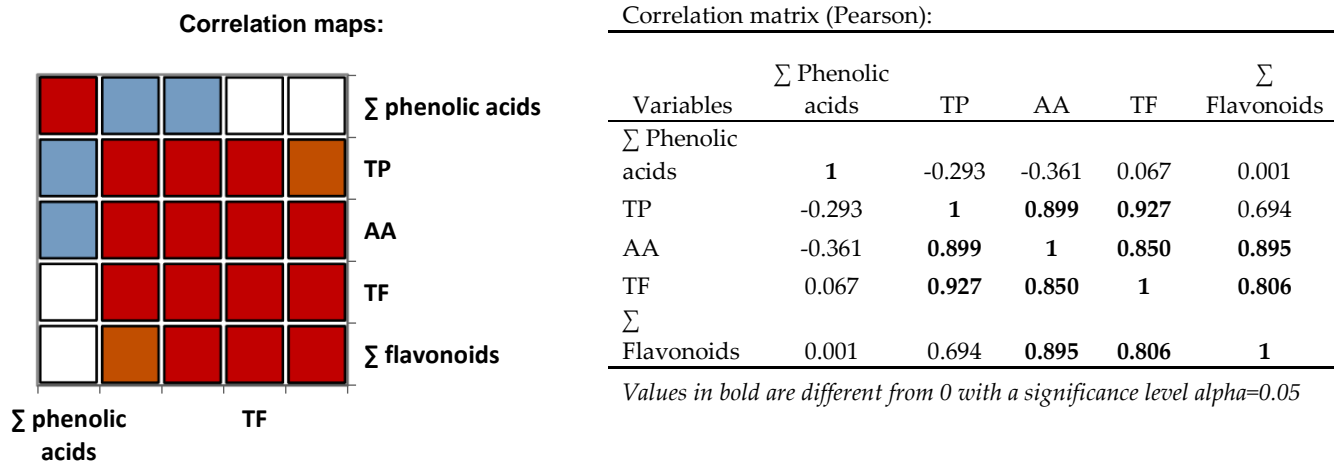

**Figure S1.** Pearson correlation between the bioactive characteristic and total phenolic acids and total flavonoids quantified by HRMS analysis in the coniferous extracts

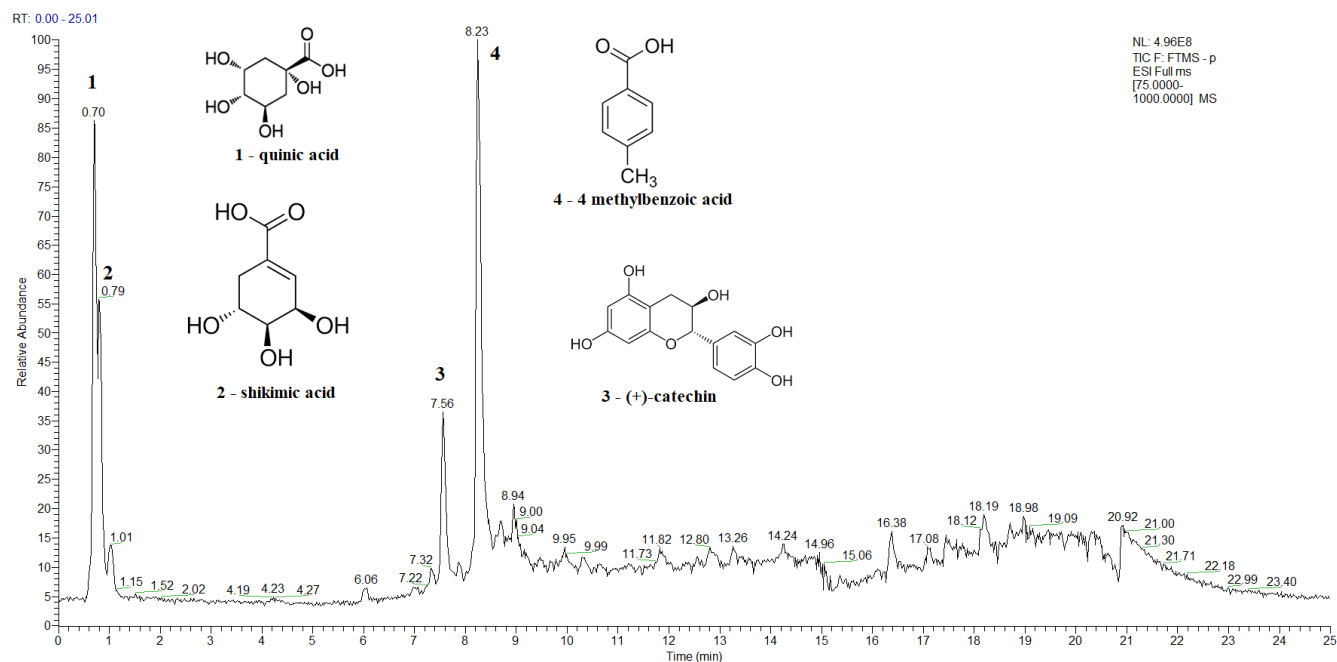

**Figure S2.** The total ion current (TIC) chromatogram showing the identification of the main bioactive compounds in spruce needles extract using UHPLC-MS/MS detection in negative ionization mode

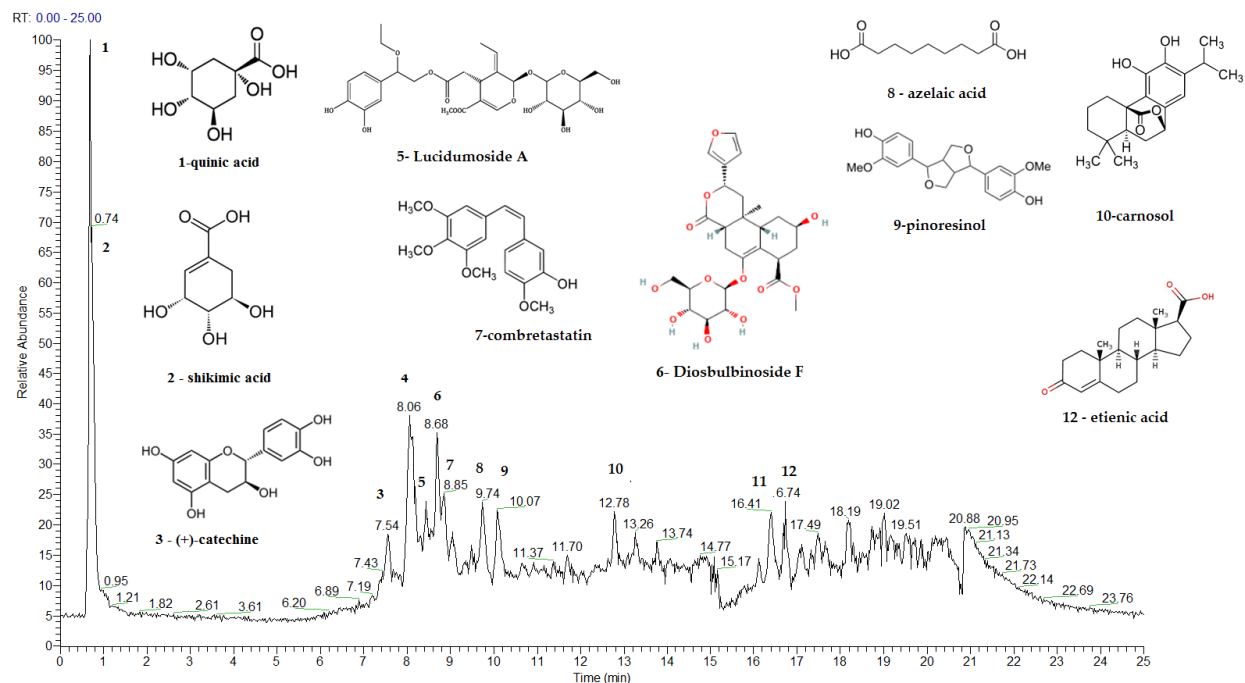

**Figure S3.** The total ion current (TIC) chromatogram showing the identification of the main bioactive compounds in fir bark extract using UHPLC-MS/MS detection in negative ionization mode

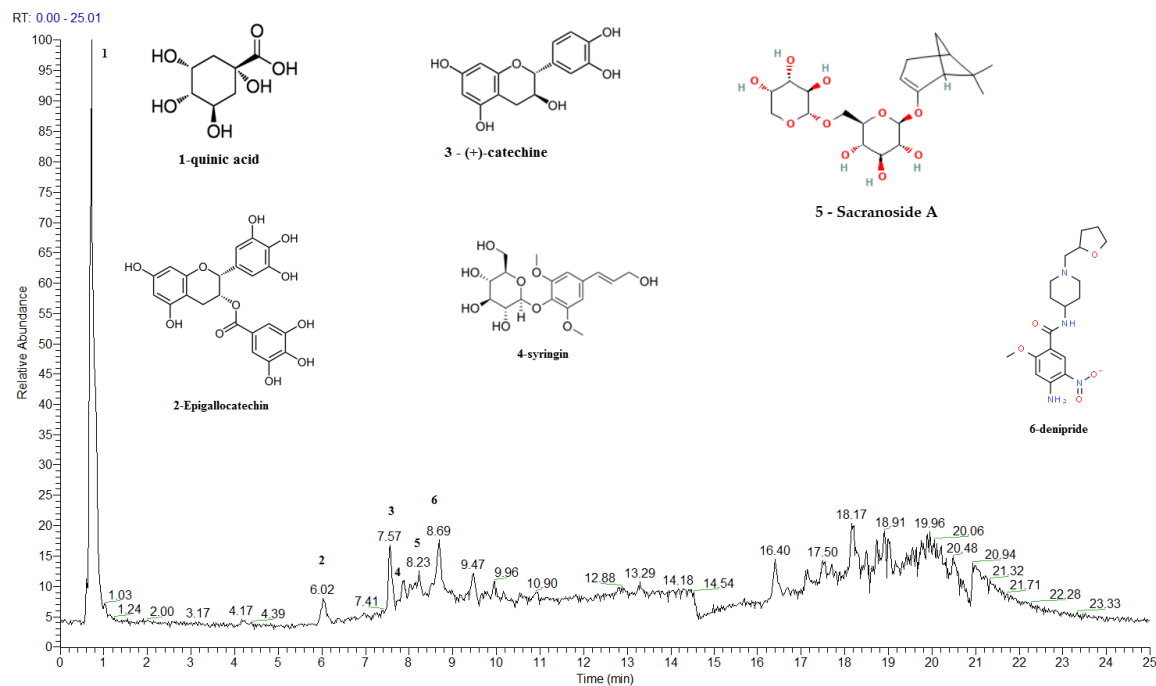

**Figure S4.** The total ion current (TIC) chromatogram showing the identification of the main bioactive compounds in fir needles extract using UHPLC-MS/MS detection in negative ionization mode

## Materials and methods

### *Protein – Ligand Docking (P-LD)*

For the *Protein – Ligand Docking (P-LD)* study it was chosen another RCSB PDB entry for PI3K $\gamma$ , namely 1E8W due to its better resolution (2.50 Å) [64]. Moreover, the co-crystallized ligands from the two RCSB PDB entries are two of the quantitatively identified natural compounds in our extracts: quercetin (ligand of 1E8W – binding affinity data:  $IC_{50} = 3.80E+3nM$  and  $K_d = 280nM$ ) [64] and myricetin (ligand of 1E90 – binding affinity data:  $IC_{50} = 1.80E+3nM$  and  $K_d = 170nM$ ) [64].

As a pre-docking operation, the structural files (PDB file format) for the two entries (1E8W and 1E90) [64] were downloaded from RCSB PDB [65–67] and superimposed with Molegro Molecular Viewer 2019 7.0.0 (MMV7 – Molexus IVS, Odder, Denmark).

Structure-data files (SDF file format) for ligands (the quantitatively identified phenolics and the majority phenolic compounds) were obtained from PubChem (<https://pubchem.ncbi.nlm.nih.gov>) [68], then individually optimized and converted in Tripos MOL2 file format (MOL2), as required for docking. MarvinSketch was used for tridimensional (3D) optimization and generations of ligands files, MarvinSketch version 23.8.0, 2023, ChemAxon (<https://chemaxon.com/>).

Two comparative P-LD runs were performed against the selected molecular target enzyme (RCSB PDB ID: 1E8W) with two different software by using two different docking algorithms (and different scoring function used to approximate the standard chemical potentials of the system) for cross-validation of results. Both P-LD runs were performed within the same search space around the binding region of quercetin (the co-crystallized ligand from the 1E8W RCSB PDB entry) to improve the docking accuracy: center coordinates: X = 25.570; Y = 50.836; Z = 26.578; dimensions (Å): X = 21.323; Y = 32.008; Z = 25.000.

First P-LD run was performed on local cloud with the AutoDock Vina v.1.2.0 algorithm [68,69] using PyRx—Python Prescription v.0.9.7 software [70] as user interface (UI) control. AutoDock Vina is a flexible-ligand docking algorithm [71], which automatically calculates the grid maps and clusters the docking results in a user accessible way for an improved user experience (UX) [68,69]. The search algorithm implemented in AutoDock Vina is a Monte-Carlo iterated search algorithm [72] combined with the Broyden-Fletcher-Goldfarb-Shanno (BFGS) gradient-based optimizer (an iterative method for solving unconstrained nonlinear optimization problems) [73,74]. Scoring function used by AutoDock Vina combines the knowledge-based potentials with empirical scoring functions and it was inspired by X-score [75] and derived with the help of the PDBbind data set [76,77]. Ranking of poses is made by measuring the distance between the experimental and the predicted structures, expressed as RMSD (root-mean-square deviation), with two terms: RMSD lower bound (RMSD/lb) and RMSD upper bound (RMSD/ub). In our docking set-up, the value of exhaustiveness (the amount of computational time spent during a docking run) was set to 200 to improve the consistency of the docking results (the scoring function requires higher exhaustiveness values for achieving good performances, while the preset value of exhaustiveness is 8) [69], disregarding the increasing computational time.

The second P-LD run was performed with the help of the SwissDock web-service (<http://www.swissdock.ch/>) [78], using EADock DSS algorithm [78,79]. EADock DSS is a flexible-ligand docking algorithm [71] with an innovative and improved sampling engine (dihedral space sampling – DDS). EADock DSS benefits of a high accuracy of a multi-objective evolutionary algorithm [80] combining two scoring functions based on the CHARMM22 force field developed for the CHARMM software [81]. Ranking of poses is made based on the *FullFitness* term, which accounts for the solvation free energy using the Generalized Born model implemented in CHARMM [81]. In our docking set-up, the docking type was set to “accurate” from the SwissDock web-service interface.

The co-crystallized ligand of PI3K $\gamma$ /1E8W (quercetin) was re-docked, serving a reference or control molecule for both P-LD runs.

## References:

1. Chupin, L.; Motillon, C.; Charrier-El Bouhtoury, F.; Pizzi, A.; Charrier, B. Characterisation of Maritime Pine (*Pinus Pinaster*) Bark Tannins Extracted under Different Conditions by Spectroscopic Methods, FTIR and HPLC. *Industrial Crops and Products* **2013**, *49*, 897–903, doi:10.1016/J.INDCROP.2013.06.045.
2. Dziedzinski, M.; Kobus-Cisowska, J.; Szymanowska, D.; Stuper-Szablewska, K.; Baranowska, M. Identification of Polyphenols from Coniferous Shoots as Natural Antioxidants and Antimicrobial Compounds. *Molecules* **2020**, *Vol. 25*, Page 3527 **2020**, *25*, 3527, doi:10.3390/MOLECULES25153527.
3. Chupin, L.; Maunu, S.L.; Reynaud, S.; Pizzi, A.; Charrier, B.; Charrier-EL Bouhtoury, F. Microwave Assisted Extraction of Maritime Pine (*Pinus Pinaster*) Bark: Impact of Particle Size and Characterization. *Industrial Crops and Products* **2015**, *65*, 142–149, doi:10.1016/j.indcrop.2014.11.052.
4. Duarte, H.; Gomes, V.; Aliaño-González, M.J.; Faleiro, L.; Romano, A.; Medronho, B. Ultrasound-Assisted Extraction of Polyphenols from Maritime Pine Residues with Deep Eutectic Solvents. *Foods* **2022**, *Vol. 11*, Page 3754 **2022**, *11*, 3754, doi:10.3390/FOODS11233754.
5. Ferreira-Santos, P.; Genisheva, Z.; Botelho, C.; Santos, J.; Ramos, C.; Teixeira, J.A.; Rocha, C.M.R. Unravelling the Biological Potential of *Pinus Pinaster* Bark Extracts. *Antioxidants* **2020**, *Vol. 9*, Page 334 **2020**, *9*, 334, doi:10.3390/ANTIOX9040334.
6. Spinelli, S.; Costa, C.; Conte, A.; Porta, N.L.; Padalino, L.; Del Nobile, M.A. Bioactive Compounds from Norway Spruce Bark: Comparison Among Sustainable Extraction Techniques for Potential Food Applications. *Foods* **2019**, *Vol. 8*, Page 524 **2019**, *8*, 524, doi:10.3390/FOODS8110524.
7. García-Pérez, M.E.; Royer, M.; Herbette, G.; Desjardins, Y.; Pouliot, R.; Stevanovic, T. Picea Mariana Bark: A New Source of Trans-Resveratrol and Other Bioactive Polyphenols. *Food Chemistry* **2012**, *135*, 1173–1182, doi:10.1016/J.FOODCHEM.2012.05.050.
8. Talmaciu, A.I.; Ravber, M.; Volf, I.; Knez, Ž.; Popa, V.I. Isolation of Bioactive Compounds from Spruce Bark Waste Using Sub- and Supercritical Fluids. *The Journal of Supercritical Fluids* **2016**, *117*, 243–251, doi:10.1016/J.SUPFLU.2016.07.001.
9. Francezon, N.; Stevanovic, T. Integrated Process for the Production of Natural Extracts from Black Spruce Bark. *Industrial Crops and Products* **2017**, *108*, 348–354, doi:10.1016/J.INDCROP.2017.06.052.
10. Stržincová, P.; Ház, A.; Burčová, Z.; Feranc, J.; Kreps, F.; Šurina, I.; Jablonský, M. Spruce Bark—A Source of Polyphenolic Compounds: Optimizing the Operating Conditions of Supercritical Carbon Dioxide Extraction. *Molecules* **2019**, *24*, doi:10.3390/MOLECULES24224049.
11. Karapandzova, M.; Stefkov, G.; Cvetkovikj, I.; Stanoeva, J.P.; Stefova, M.; Kulevanova, S. Flavonoids and Other Phenolic Compounds in Needles of *Pinus Peuce* and Other Pine Species from the Macedonian Flora. <https://doi.org/10.1177/1934578X1501000647> **2015**, *10*, doi:10.1177/1934578X1501000647.
12. Yen, G.C.; Duh, P.D.; Huang, D.W.; Hsu, C.L.; Fu, T.Y.C. Protective Effect of Pine (*Pinus Morrisonicola* Hay.) Needle on LDL Oxidation and Its Anti-Inflammatory Action by Modulation of INOS and COX-2 Expression in LPS-Stimulated RAW 264.7 Macrophages. *Food and Chemical Toxicology* **2008**, *46*, 175–185, doi:10.1016/J.FCT.2007.07.012.
13. Szwajkowska-Michalek, L.; Przybylska-Balcerek, A.; Rogoziński, T.; Stuper-Szablewska, K. Phenolic Compounds in Trees and Shrubs of Central Europe. *Applied Sciences* **2020**, *Vol. 10*, Page 6907 **2020**, *10*, 6907, doi:10.3390/APP10196907.
14. Chmelová, D.; Škulcová, D.; Legerská, B.; Horník, M.; Ondrejovič, M. Ultrasonic-Assisted Extraction of Polyphenols and Antioxidants from *Picea Abies* Bark. *Journal of Biotechnology* **2020**, *314–315*, 25–33, doi:10.1016/J.JBIOTEC.2020.04.003.



15. Bocalandro, C.; Sanhueza, V.; Gómez-Caravaca, A.M.; González-álvarez, J.; Fernández, K.; Roeckel, M.; Rodríguez-Estrada, M.T. Comparison of the Composition of Pinus Radiata Bark Extracts Obtained at Bench- and Pilot-Scales. *Industrial Crops and Products* **2012**, *38*, 21–26, doi:10.1016/J.INDCROP.2012.01.001.
16. Bai, J.; Wu, Y.; Zhong, K.; Xiao, K.; Liu, L.; Huang, Y.; Wang, Z.; Hong, G.A.O. A Comparative Study on the Effects of Quinic Acid and Shikimic Acid on Cellular Functions of Staphylococcus Aureus. *Journal of Food Protection* **2018**, *81*, 1187–1192, doi:10.4315/0362-028X.JFP-18-014.
17. Wu, S.; Chen, W.; Lu, S.; Zhang, H.; Yin, L. Metabolic Engineering of Shikimic Acid Biosynthesis Pathway for the Production of Shikimic Acid and Its Branched Products in Microorganisms: Advances and Prospects. *Molecules* **2022**, Vol. 27, Page 4779 **2022**, *27*, 4779, doi:10.3390/MOLECULES27154779.
18. Gao, X. han; Zhang, S. dong; Wang, L. tao; Yu, L.; Zhao, X. lian; Ni, H. yan; Wang, Y. qiu; Wang, J. dong; Shan, C. hua; Fu, Y. jie Anti-Inflammatory Effects of Neochlorogenic Acid Extract from Mulberry Leaf (Morus Alba L.) Against LPS-Stimulated Inflammatory Response through Mediating the AMPK/Nrf2 Signaling Pathway in A549 Cells. *Molecules* **2020**, Vol. 25, Page 1385 **2020**, *25*, 1385, doi:10.3390/MOLECULES25061385.
19. Ingole, A.; Kadam, M.P.; Dalu, A.P.; Kute, S.M.; Mange, P.R.; Theng, V.D.; Lahane, O.R.; Nikas, A.P.; Kawal, Y.V.; Nagrik, S.U.; et al. A Review of the Pharmacological Characteristics of Vanillic Acid. *J. Drug Delivery Ther.* **2021**, *11*, 200–204, doi:10.22270/jddt.v11i2-S.4823.
20. Xue, C.; Lu, H.; Liu, Y.; Zhang, J.; Wang, J.; Luo, W.; Zhang, W.; Chen, J. Trans-Ferulic Acid-4-β-Glucoside Alleviates Cold-Induced Oxidative Stress and Promotes Cold Tolerance. *Int J Mol Sci* **2018**, *19*, 2321, doi:10.3390/ijms19082321.
21. Antognoni, F.; Perellino, N.C.; Crippa, S.; Dal Toso, R.; Danieli, B.; Minghetti, A.; Poli, F.; Pressi, G. Irbic Acid, a Dicafeoylquinic Acid Derivative from Centella Asiatica Cell Cultures. *Fitoterapia* **2011**, *82*, 950–954, doi:10.1016/j.fitote.2011.05.008.
22. Magnani, C.; Isaac, V.L.B.; Correa, M.A.; Salgado, H.R.N. Caffeic Acid: A Review of Its Potential Use in Medications and Cosmetics. *Analytical Methods* **2014**, *6*, 3203–3210, doi:10.1039/C3AY41807C.
23. Pandi, A.; Kalappan, V.M. Pharmacological and Therapeutic Applications of Sinapic Acid—an Updated Review. *Molecular Biology Reports* **2021**, *48*, 3733–3745, doi:10.1007/S11033-021-06367-0/FIGURES/4.
24. Gunasekaran, S.; Venkatachalam, K.; Namasivayam, N. Anti-Inflammatory and Anticancer Effects of p-Methoxycinnamic Acid, an Active Phenylpropanoid, against 1,2-Dimethylhydrazine-Induced Rat Colon Carcinogenesis. *Molecular and Cellular Biochemistry* **2019**, *451*, 117–129, doi:10.1007/S11010-018-3398-5/FIGURES/8.
25. Chen, H.; Wang, W.; Yu, S.; Wang, H.; Tian, Z.; Zhu, S. Procyanidins and Their Therapeutic Potential against Oral Diseases. *Molecules* **2022**, *27*, doi:10.3390/MOLECULES27092932.
26. Liang, X.; Hu, C.; Liu, C.; Yu, K.; Zhang, J.; Jia, Y. Dihydrokaempferol (DHK) Ameliorates Severe Acute Pancreatitis (SAP) via Keap1/Nrf2 Pathway. *Life Sciences* **2020**, *261*, 118340, doi:10.1016/j.lfs.2020.118340.
27. Thuan, N.H.; Shrestha, A.; Trung, N.T.; Tatipamula, V.B.; Van Cuong, D.; Canh, N.X.; Van Giang, N.; Kim, T.S.; Sohng, J.K.; Dhakal, D. Advances in Biochemistry and the Biotechnological Production of Taxifolin and Its Derivatives. *Biotechnology and Applied Biochemistry* **2022**, *69*, 848–861, doi:10.1002/BAB.2156.
28. Rauf, A.; Imran, M.; Abu-Izneid, T.; Iahtisham-Ul-Haq; Patel, S.; Pan, X.; Naz, S.; Sanches Silva, A.; Saeed, F.; Rasul Suleria, H.A. Proanthocyanidins: A Comprehensive Review. *Biomedicine & Pharmacotherapy* **2019**, *116*, 108999, doi:10.1016/J.BIOPHA.2019.108999.

29. Motlhatlego, K.E.; Abdalla, M.A.; Leonard, C.M.; Eloff, J.N.; McGaw, L.J. Inhibitory Effect of Newtonia Extracts and Myricetin-3-o-Rhamnoside (Myricitrin) on Bacterial Biofilm Formation. *BMC Complement Med Ther* **2020**, *20*, 358, doi:10.1186/s12906-020-03139-4.
30. Wei, L.; Lv, S.; Huang, Q.; Wei, J.; Zhang, S.; Huang, R.; Lu, Z.; Lin, X. Pratensein Attenuates A $\beta$ -Induced Cognitive Deficits in Rats: Enhancement of Synaptic Plasticity and Cholinergic Function. *Fitoterapia* **2015**, *101*, 208–217, doi:10.1016/j.fitote.2015.01.017.
31. Lin, Y.; Liu, P.-G.; Liang, W.-Q.; Hu, Y.-J.; Xu, P.; Zhou, J.; Pu, J.-B.; Zhang, H.-J. Luteolin-4'-O-Glucoside and Its Aglycone, Two Major Flavones of Gnaphalium Affine D. Don, Resist Hyperuricemia and Acute Gouty Arthritis Activity in Animal Models. *Phytomedicine* **2018**, *41*, 54–61, doi:10.1016/j.phymed.2018.02.002.
32. He, M.; Min, J.W.; Kong, W.L.; He, X.H.; Li, J.X.; Peng, B.W. A Review on the Pharmacological Effects of Vitexin and Isovitexin. *Fitoterapia* **2016**, *115*, 74–85, doi:10.1016/J.FITOTE.2016.09.011.
33. de Araújo Lopes, A.; Magalhães, T.R.; de Andrade Uchôa, D.E.; Silveira, E.R.; Azzolini, A.E.C.S.; Kabeya, L.M.; Lucisano-Valim, Y.M.; Vasconcelos, S.M.M.; de Barros Viana, G.S.; Leal, L.K.A.M. Afrormosin, an Isoflavonoid from Amburana Cearensis A. C. Smith, Modulates the Inflammatory Response of Stimulated Human Neutrophils. *Basic Clin Pharmacol Toxicol* **2013**, *113*, 363–369, doi:10.1111/bcpt.12106.
34. Kim, Y.W.; Zhao, R.J.; Park, S.J.; Lee, J.R.; Cho, I.J.; Yang, C.H.; Kim, S.G.; Kim, S.C. Anti-Inflammatory Effects of Liquiritigenin as a Consequence of the Inhibition of NF-KappaB-Dependent INOS and Proinflammatory Cytokines Production. *Br J Pharmacol* **2008**, *154*, 165–173, doi:10.1038/bjp.2008.79.
35. Hernández Tasco, A.J.; Ramírez Rueda, R.Y.; Alvarez, C.J.; Sartori, F.T.; Sacilotto, A.C.B.C.; Ito, I.Y.; Vichnewski, W.; Salvador, M.J. Antibacterial and Antifungal Properties of Crude Extracts and Isolated Compounds from Lychnophora Markgravii. *Natural Product Research* **2020**, *34*, 863–867, doi:10.1080/14786419.2018.1503263.
36. Pan, W.; Ikeda, K.; Takebe, M.; Yamori, Y. Genistein, Daidzein and Glycitein Inhibit Growth and DNA Synthesis of Aortic Smooth Muscle Cells from Stroke-Prone Spontaneously Hypertensive Rats. *The Journal of Nutrition* **2001**, *131*, 1154–1158, doi:10.1093/jn/131.4.1154.
37. Angeloni, S.; Navarini, L.; Khamitova, G.; Maggi, F.; Sagratini, G.; Vittori, S.; Caprioli, G. A New Analytical Method for the Simultaneous Quantification of Isoflavones and Lignans in 25 Green Coffee Samples by HPLC-MS/MS. *Food Chemistry* **2020**, *325*, 126924, doi:10.1016/j.foodchem.2020.126924.
38. Romo Vaquero, M.; García Villalba, R.; Larrosa, M.; Yáñez-Gascón, M.J.; Fromentin, E.; Flanagan, J.; Roller, M.; Tomás-Barberán, F.A.; Espín, J.C.; García-Conesa, M.-T. Bioavailability of the Major Bioactive Diterpenoids in a Rosemary Extract: Metabolic Profile in the Intestine, Liver, Plasma, and Brain of Zucker Rats. *Molecular Nutrition & Food Research* **2013**, *57*, 1834–1846, doi:10.1002/mnfr.201300052.
39. Latva-Mäenpää, H. Bioactive and Protective Polyphenolics from Roots and Stumps of Conifer Trees (Norway Spruce and Scots Pine). **2017**.
40. Shan, Y.S.; Zhang, J.; Liu, Z.; Wang, M.; Dong, Y. Developments of Combretastatin A-4 Derivatives as Anticancer Agents. *Current Medicinal Chemistry* **18**, 523–538.
41. Tan, T.; Li, T.; Xiang, C.; Ouyang, Z. Toosendanin Inhibits Osteoclast Formation and Alleviate Postmenopausal Osteoporosis by Regulating the P38 Signaling Pathway. *Int Immunopharmacol* **2023**, *116*, 109745, doi:10.1016/j.intimp.2023.109745.
42. Looi, C.Y.; Arya, A.; Cheah, F.K.; Muharram, B.; Leong, K.H.; Mohamad, K.; Wong, W.F.; Rai, N.; Mustafa, M.R. Induction of Apoptosis in Human Breast Cancer Cells via Caspase Pathway by Vernodalin Isolated from Centratherum Anthelminticum (L.) Seeds. *PLoS One* **2013**, *8*, e56643, doi:10.1371/journal.pone.0056643.

43. Zhao, Q.; Yan, X.; Yue, Y.; Yue, T.; Yuan, Y. Improved Flavonoid Content in Mulberry Leaves by Solid-State Fermentation: Metabolic Profile, Activity, and Mechanism. *Innovative Food Science & Emerging Technologies* **2023**, *84*, 103308, doi:10.1016/j.ifset.2023.103308.
44. Li, S.A.; Cadelis, M.M.; Deed, R.C.; Douafer, H.; Bourguet-Kondracki, M.-L.; Michel Brunel, J.; Copp, B.R. Valorisation of the Diterpene Podocarpic Acid – Antibiotic and Antibiotic Enhancing Activities of Polyamine Conjugates. *Bioorganic & Medicinal Chemistry* **2022**, *64*, 116762, doi:10.1016/j.bmc.2022.116762.
45. Habtemariam, S. Anti-Inflammatory Therapeutic Mechanisms of Natural Products: Insight from Rosemary Diterpenes, Carnosic Acid and Carnosol. *Biomedicines* **2023**, *11*, 545, doi:10.3390/biomedicines11020545.
46. Fernández-Ochoa, Á.; Borrás-Linares, I.; Pérez-Sánchez, A.; Barraón-Catalán, E.; González-Álvarez, I.; Arráez-Román, D.; Micol, V.; Segura-Carretero, A. Phenolic Compounds in Rosemary as Potential Source of Bioactive Compounds against Colorectal Cancer: In Situ Absorption and Metabolism Study. *Journal of Functional Foods* **2017**, *33*, 202–210, doi:10.1016/j.jff.2017.03.046.
47. Wikul, A.; Damsud, T.; Kataoka, K.; Phuwapraisrisan, P. (+)-Pinoresinol Is a Putative Hypoglycemic Agent in Defatted Sesame (*Sesamum Indicum*) Seeds Though Inhibiting  $\alpha$ -Glucosidase. *Bioorganic & Medicinal Chemistry Letters* **2012**, *22*, 5215–5217.
48. Saive, M.; Genva, M.; Istasse, T.; Frederich, M.; Maes, C.; Fauconnier, M.-L. Identification of a Proanthocyanidin from Litchi *Chinensis* Sonn. Root with Anti-Tyrosinase and Antioxidant Activity. *Biomolecules* **2020**, *10*, 1347, doi:10.3390/biom10091347.
49. Alam, F.; Mohammadin, K.; Shafique, Z.; Amjad, S.T.; Asad, M.H.H.B. Citrus Flavonoids as Potential Therapeutic Agents: A Review. *Phytother Res* **2022**, *36*, 1417–1441, doi:10.1002/ptr.7261.
50. Sinmisola, A.; Oluwasesan, B.M.; Chukwuemeka, A.P. Blighia Sapida K.D. Koenig: A Review on Its Phytochemistry, Pharmacological and Nutritional Properties. *Journal of Ethnopharmacology* **2019**, *235*, 446–459, doi:10.1016/j.jep.2019.01.017.
51. Spaggiari, C.; Annunziato, G.; Spadini, C.; Montanaro, S.L.; Iannarelli, M.; Cabassi, C.S.; Costantino, G. Extraction and Quantification of Azelaic Acid from Different Wheat Samples (*Triticum Durum* Desf.) and Evaluation of Their Antimicrobial and Antioxidant Activities. *Molecules* **2023**, *28*, 2134, doi:10.3390/molecules28052134.
52. Dahibhate, N.L.; Dwivedi, P.; Kumar, K. GC–MS and UHPLC–HRMS Based Metabolite Profiling of *Bruguiera Gymnorhiza* Reveals Key Bioactive Compounds. *South African Journal of Botany* **2022**, *149*, 1044–1048, doi:10.1016/j.sajb.2022.02.004.
53. More, G.K.; Vervoort, J.; Steenkamp, P.A.; Prinsloo, G. Metabolomic Profile of Medicinal Plants with Anti-RVSV Activity. *Heliyon* **2022**, *8*, e08936, doi:10.1016/j.heliyon.2022.e08936.
54. Ghyselinck, N.B.; Duester, G. Retinoic Acid Signaling Pathways. *Development* **2019**, *146*, dev167502, doi:10.1242/dev.167502.
55. Rosenstock, J.; Del Prato, S. Basal Weekly Insulins: The Way of the Future! *Metabolism* **2022**, *126*, 154924, doi:10.1016/j.metabol.2021.154924.
56. Dong, H.; Wu, M.; Wang, Y.; Du, W.; He, Y.; Shi, Z. Total Syntheses and Anti-Inflammatory Activities of Syringin and Its Natural Analogues. *J Nat Prod* **2021**, *84*, 2866–2874, doi:10.1021/acs.jnatprod.1c00585.
57. He, Z. D., But, P. P. H., Chan, T. W. D., Dong, H., XU, H. X., Lau, C. P., & Sun, H.D. Antioxidative Glucosides from the Fruits of *Ligustrum Lucidum*. *Chemical and Pharmaceutical Bulletin* **2001**, *49*, 780–784.
58. Hai Liu, Gui-Xin Chou, Yin-Long Guo, Li-Li Ji, Jun-Ming Wang, Z.-T.W. Norclerodane Diterpenoids from Rhizomes of *Dioscorea Bulbifera*. *Phytochemistry* **2010**, *71*, 1174–1180.

59. Bansal, R.; Suryan, A. A Comprehensive Review on Steroidal Bioconjugates as Promising Leads in Drug Discovery. *ACS Bio and Med Chem Au* **2022**, *2*, 340–369, doi:10.1021/ACSBIOEDCHEMAU.1C00071/ASSET/IMAGES/LARGE/BG1C00071\_0024.JPEG.
60. Jiao, W.; Sang, Y.; Wang, X.; Wang, S. Metabonomics and the Gut Microbiome Analysis of the Effect of 6-Shogaol on Improving Obesity. *Food Chemistry* **2023**, *404*, 134734, doi:10.1016/j.foodchem.2022.134734.
61. Netravati; Gomez, S.; Pathrose, B.; N, M.R.; P, M.J.; Kuruvila, B. Comparative Evaluation of Anthocyanin Pigment Yield and Its Attributes from Butterfly Pea (*Clitoria Ternatea* L.) Flowers as Prospective Food Colorant Using Different Extraction Methods. *Future Foods* **2022**, *6*, 100199, doi:10.1016/j.fufo.2022.100199.
62. An, Y.; Luo, Q.; Han, D.; Guan, L. Abietic Acid Inhibits Acetaminophen-Induced Liver Injury by Alleviating Inflammation and Ferroptosis through Regulating Nrf2/HO-1 Axis. *Int Immunopharmacol* **2023**, *118*, 110029, doi:10.1016/j.intimp.2023.110029.
63. Simu, S.Y.; Alam, M.B.; Kim, S.Y. The Activation of Nrf2/HO-1 by 8-Epi-7-Deoxyloganic Acid Attenuates Inflammatory Symptoms through the Suppression of the MAPK/NF-KB Signaling Cascade in In Vitro and In Vivo Models. *Antioxidants* **2022**, *11*, 1765, doi:10.3390/ANTIOX11091765/S1.
64. Walker, E.H.; Pacold, M.E.; Perisic, O.; Stephens, L.; Hawkins, P.T.; Wymann, M.P.; Williams, R.L. Structural Determinants of Phosphoinositide 3-Kinase Inhibition by Wortmannin, LY294002, Quercetin, Myricetin, and Staurosporine. *Molecular Cell* **2000**, *6*, 909–919, doi:10.1016/S1097-2765(05)00089-4.
65. Berman, H.M.; Westbrook, J.; Feng, Z.; Gilliland, G.; Bhat, T.N.; Weissig, H.; Shindyalov, I.N.; Bourne, P.E. The Protein Data Bank. *Nucleic Acids Res* **2000**, *28*, 235–242.
66. Burley, S.K.; Bhikadiya, C.; Bi, C.; Bittrich, S.; Chen, L.; Crichlow, G.V.; Duarte, J.M.; Dutta, S.; Fayazi, M.; Feng, Z.; et al. RCSB Protein Data Bank: Celebrating 50 Years of the PDB with New Tools for Understanding and Visualizing Biological Macromolecules in 3D. *Protein Sci* **2022**, *31*, 187–208, doi:10.1002/pro.4213.
67. Burley, S.K.; Bhikadiya, C.; Bi, C.; Bittrich, S.; Chen, L.; Crichlow, G.V.; Christie, C.H.; Dalenberg, K.; Di Costanzo, L.; Duarte, J.M.; et al. RCSB Protein Data Bank: Powerful New Tools for Exploring 3D Structures of Biological Macromolecules for Basic and Applied Research and Education in Fundamental Biology, Biomedicine, Biotechnology, Bioengineering and Energy Sciences. *Nucleic Acids Res* **2020**, *49*, D437–D451, doi:10.1093/nar/gkaa1038.
68. Trott, O.; Olson, A.J. AutoDock Vina: Improving the Speed and Accuracy of Docking with a New Scoring Function, Efficient Optimization and Multithreading. *J Comput Chem* **2010**, *31*, 455–461, doi:10.1002/jcc.21334.
69. Eberhardt, J.; Santos-Martins, D.; Tillack, A.F.; Forli, S. AutoDock Vina 1.2.0: New Docking Methods, Expanded Force Field, and Python Bindings. *J Chem Inf Model* **2021**, *61*, 3891–3898, doi:10.1021/acs.jcim.1c00203.
70. Dallakyan, S.; Olson, A.J. Small-Molecule Library Screening by Docking with PyRx. In *Chemical Biology: Methods and Protocols*; Hempel, J.E., Williams, C.H., Hong, C.C., Eds.; Methods in Molecular Biology; Springer: New York, NY, 2015; pp. 243–250 ISBN 978-1-4939-2269-7.
71. Huang, S.-Y. Comprehensive Assessment of Flexible-Ligand Docking Algorithms: Current Effectiveness and Challenges. *Brief Bioinform* **2018**, *19*, 982–994, doi:10.1093/bib/bbx030.
72. Świechowski, M.; Godlewski, K.; Sawicki, B.; Mańdziuk, J. Monte Carlo Tree Search: A Review of Recent Modifications and Applications. *Artif Intell Rev* **2023**, *56*, 2497–2562, doi:10.1007/s10462-022-10228-y.
73. Fundamentals of Unconstrained Optimization. In *Numerical Optimization*; Nocedal, J., Wright, S.J., Eds.; Springer Series in Operations Research and Financial Engineering; Springer: New York, NY, 2006; pp. 10–29 ISBN 978-0-387-40065-5.

74. Interior-Point Methods for Nonlinear Programming. In *Numerical Optimization*; Nocedal, J., Wright, S.J., Eds.; Springer Series in Operations Research and Financial Engineering; Springer: New York, NY, 2006; pp. 563–597 ISBN 978-0-387-40065-5.
75. Wang, R.; Lai, L.; Wang, S. Further Development and Validation of Empirical Scoring Functions for Structure-Based Binding Affinity Prediction. *J Comput Aided Mol Des* **2002**, *16*, 11–26, doi:10.1023/a:1016357811882.
76. Wang, R.; Fang, X.; Lu, Y.; Wang, S. The PDBbind Database: Collection of Binding Affinities for Protein-Ligand Complexes with Known Three-Dimensional Structures. *J Med Chem* **2004**, *47*, 2977–2980, doi:10.1021/jm030580l.
77. Wang, R.; Fang, X.; Lu, Y.; Yang, C.-Y.; Wang, S. The PDBbind Database: Methodologies and Updates. *J Med Chem* **2005**, *48*, 4111–4119, doi:10.1021/jm048957q.
78. Grosdidier, A.; Zoete, V.; Michielin, O. Fast Docking Using the CHARMM Force Field with EADock DSS. *J Comput Chem* **2011**, *32*, 2149–2159, doi:10.1002/jcc.21797.
79. Grosdidier, A.; Zoete, V.; Michielin, O. SwissDock, a Protein-Small Molecule Docking Web Service Based on EADock DSS. *Nucleic Acids Res* **2011**, *39*, W270–W277, doi:10.1093/nar/gkr366.
80. Grosdidier, A.; Zoete, V.; Michielin, O. Blind docking of 260 protein–ligand complexes with EADock 2.0. *Journal of Computational Chemistry* **2009**, *30*, 2021–2030, doi:10.1002/jcc.21202.
81. Brooks, B.R.; Brooks III, C.L.; Mackerell Jr., A.D.; Nilsson, L.; Petrella, R.J.; Roux, B.; Won, Y.; Archontis, G.; Bartels, C.; Boresch, S.; et al. CHARMM: The Biomolecular Simulation Program. *Journal of Computational Chemistry* **2009**, *30*, 1545–1614, doi:10.1002/jcc.21287.
